# Supplementary material
Source: Springer Nature journal article supplement (https://www.springermedizin.de/resource/supplementary/12891_2013_1945_MOESM5_ESM.pdf/9508860)

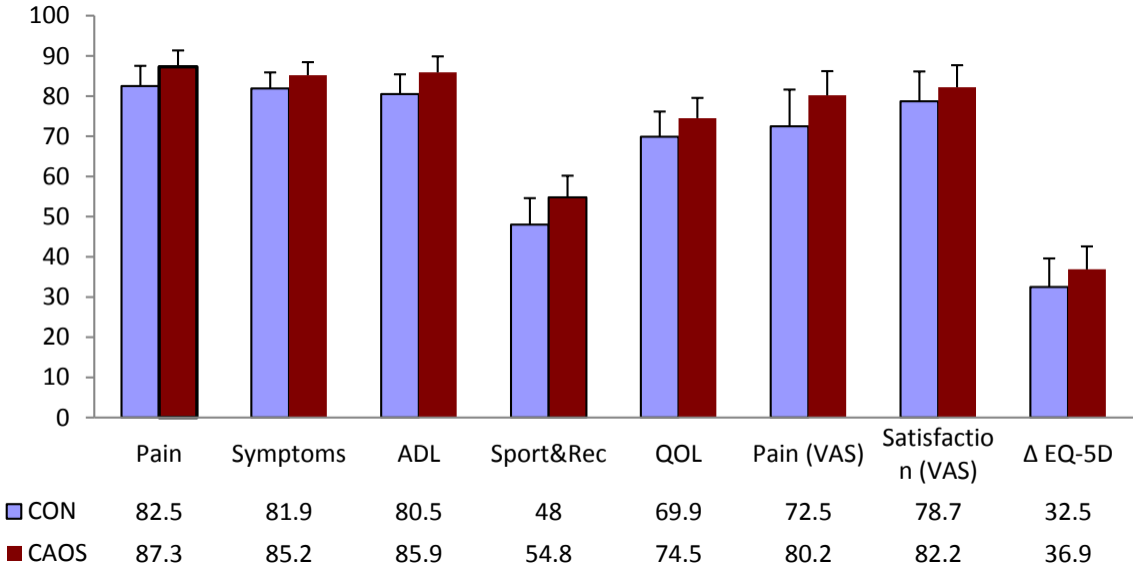

Supplement: MOESM5 [file 9508860]
